# Supplementary material for: Imp/IGF2BP levels modulate individual neural stem cell growth and division through myc mRNA stability
Source: eLife journal article supplement (doi:10.7554/elife.51529), 2020-01-14
Supplement: supp [file elife-51529-supp-v1.zip]

|                              |         | Imp level | <i>myc</i> transcription | <i>myc</i> half-life | <i>myc</i> transcript number | NB size |
|------------------------------|---------|-----------|--------------------------|----------------------|------------------------------|---------|
| Imp level                    | r       |           | -0.1282                  | 0.3435               | 0.2012                       | 0.0457  |
|                              | p value |           | 0.3289                   | 0.0072               | 0.1232                       | 0.7287  |
| <i>myc</i> transcription     | r       | -0.1282   |                          | -0.6641              | 0.1129                       | 0.0087  |
|                              | p value | 0.3289    |                          | 7.28E-09             | 0.3904                       | 0.9472  |
| <i>myc</i> half-life         | r       | 0.3435    | -0.6641                  |                      | 0.4245                       | 0.1311  |
|                              | p value | 0.0072    | 7.28E-09                 |                      | 0.0007                       | 0.3181  |
| <i>myc</i> transcript number | r       | 0.2012    | 0.1129                   | 0.4245               |                              | 0.2810  |
|                              | p value | 0.1232    | 0.3904                   | 0.0007               |                              | 0.0296  |
| NB size                      | r       | 0.0457    | 0.0087                   | 0.1311               | 0.2810                       |         |
|                              | p value | 0.7287    | 0.9472                   | 0.3181               | 0.0296                       |         |
