# Supplementary figures and images for: Imp/IGF2BP levels modulate individual neural stem cell growth and division through myc mRNA stability
Source: eLife journal article supplement (doi:10.7554/elife.51529), 2020-01-14

**A***wild type**Syp* RNAi*Imp* RNAi\_*Syp* RNAi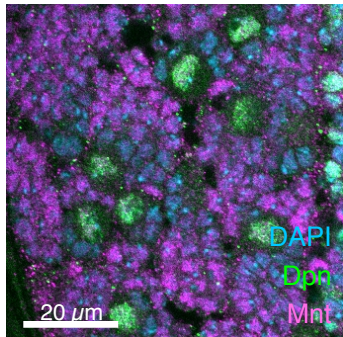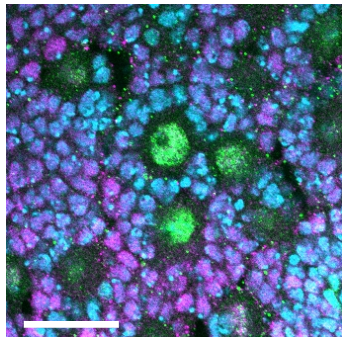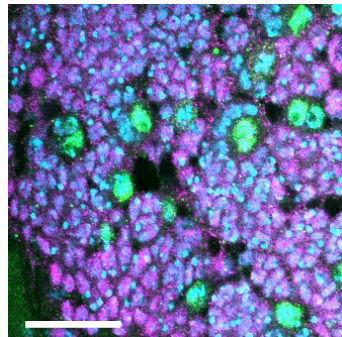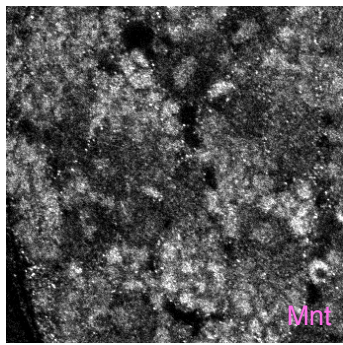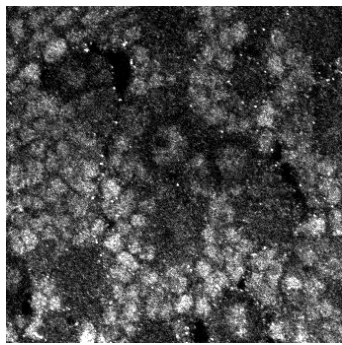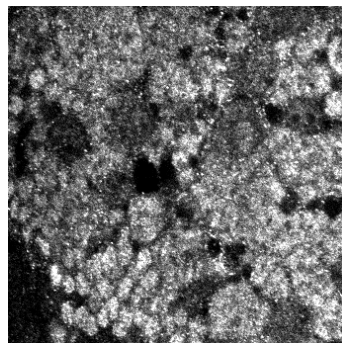**B***wild type**Syp* RNAi*Myc* OE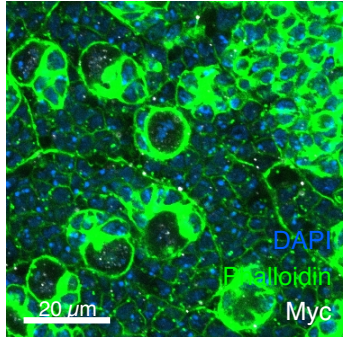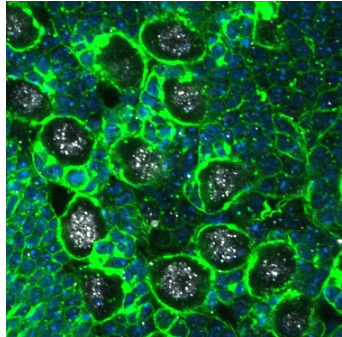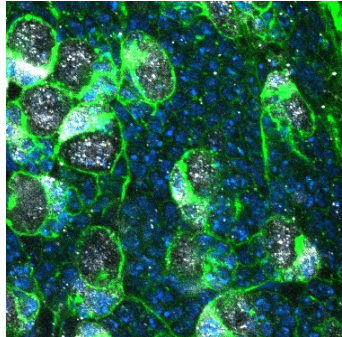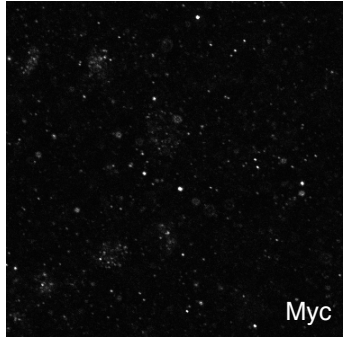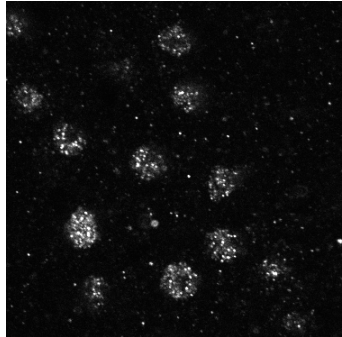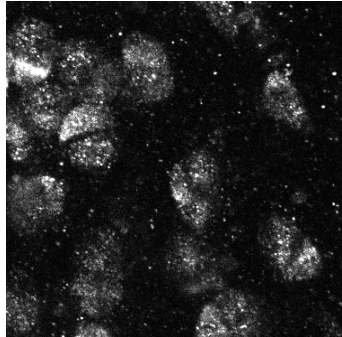

Supplement: supp [file elife-51529-supp-v1.zip]

**A**

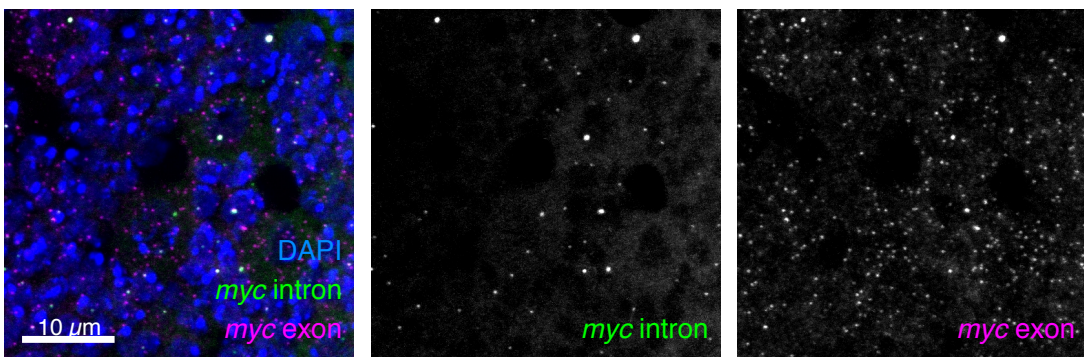

**B**

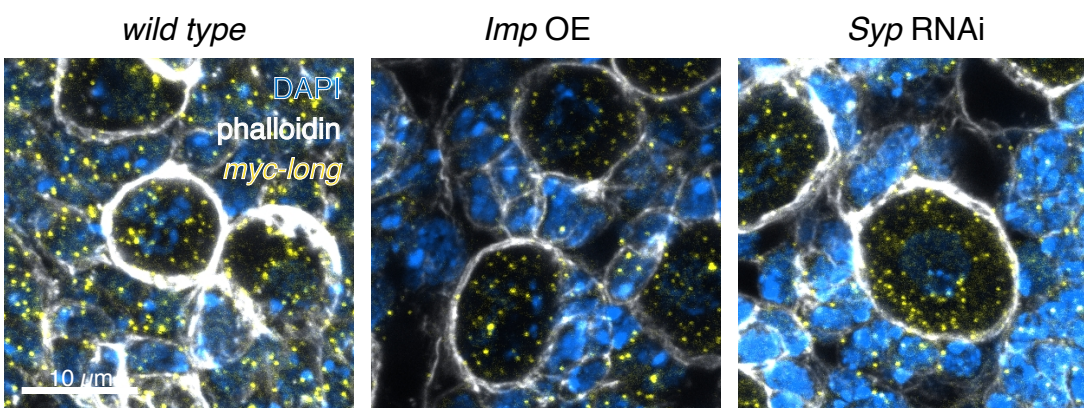

**C**

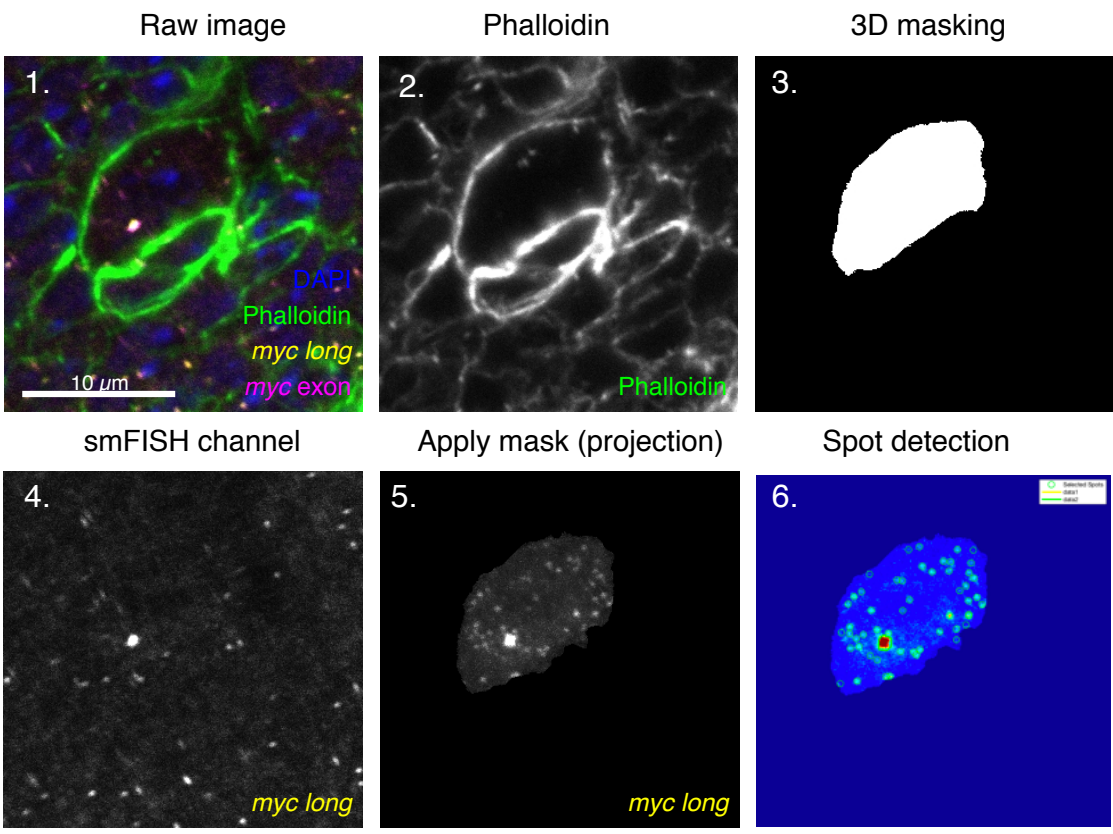

Supplement: supp [file elife-51529-supp-v1.zip]

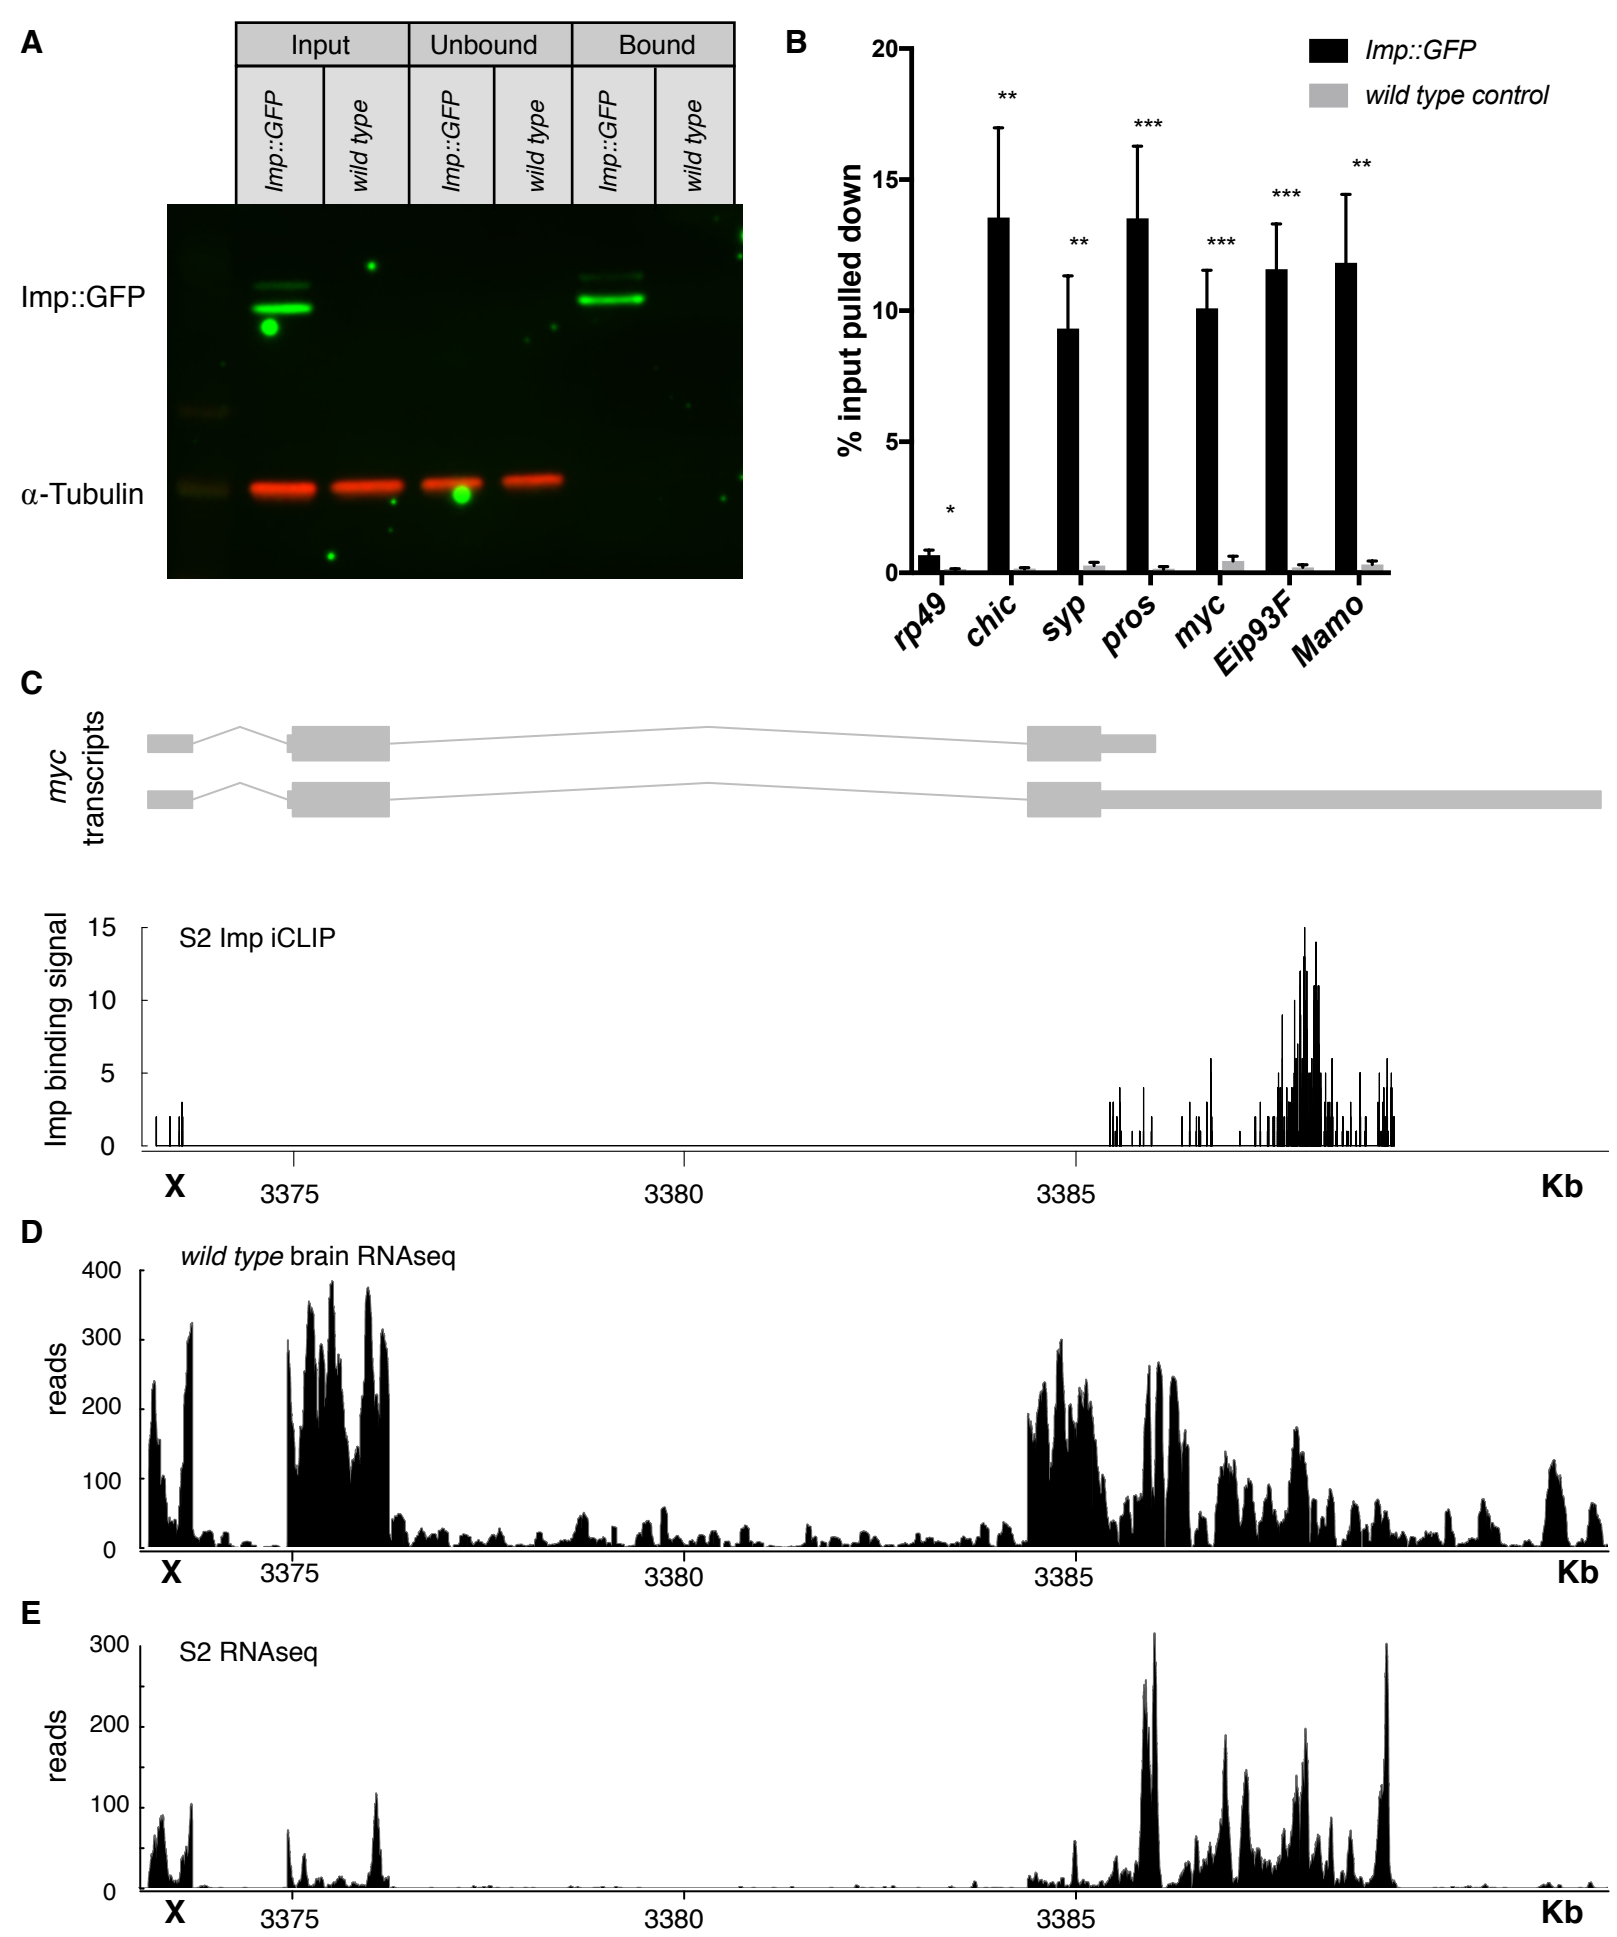

Supplement: supp [file elife-51529-supp-v1.zip]

**A***wild type*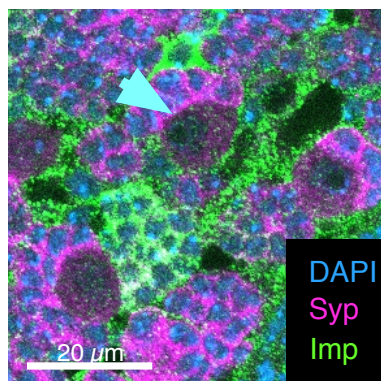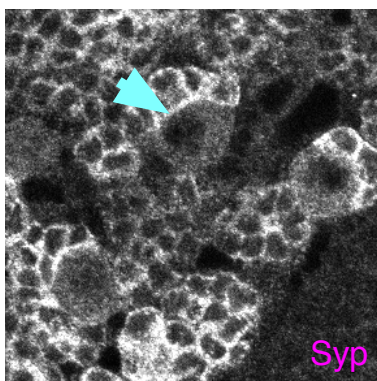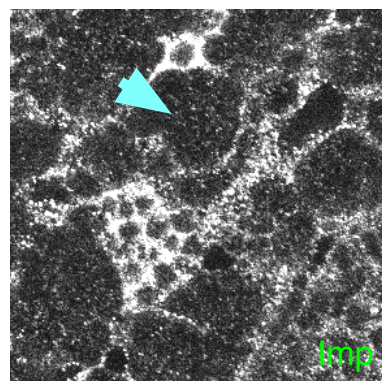**B***Syp RNAi*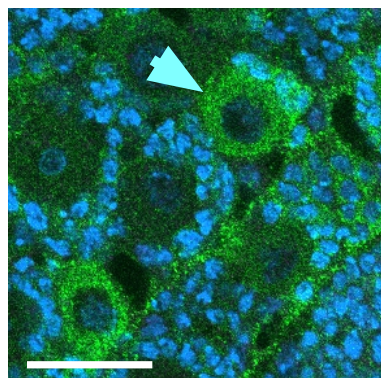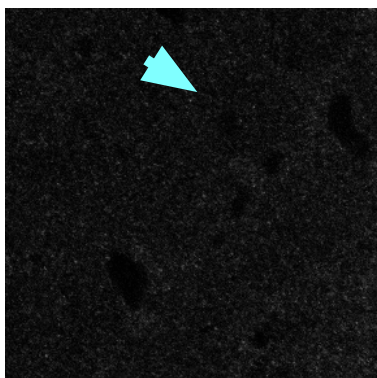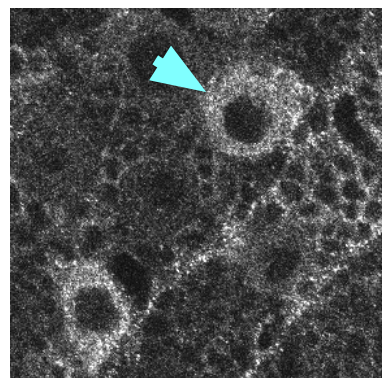**C***Imp RNAi\_Syp RNAi*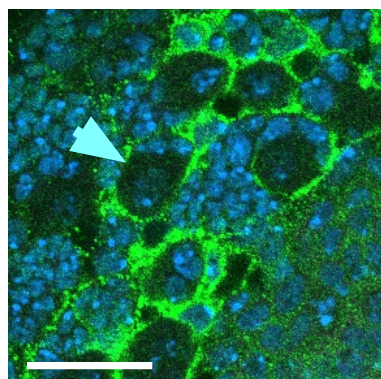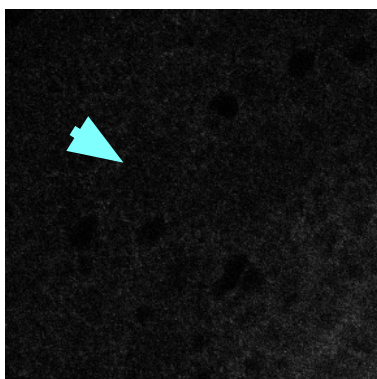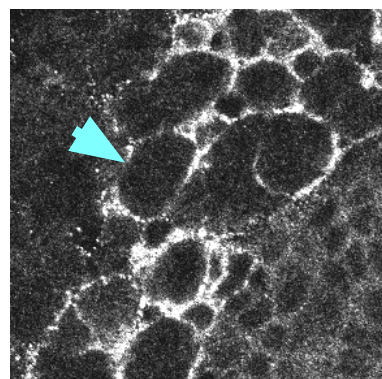**D***Imp OE*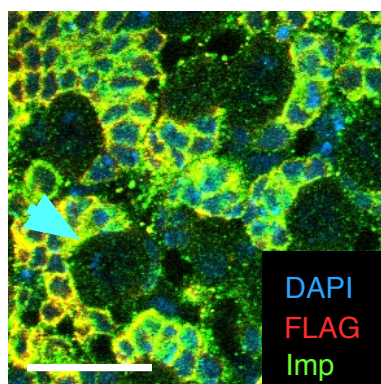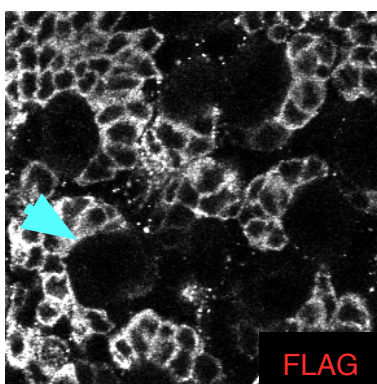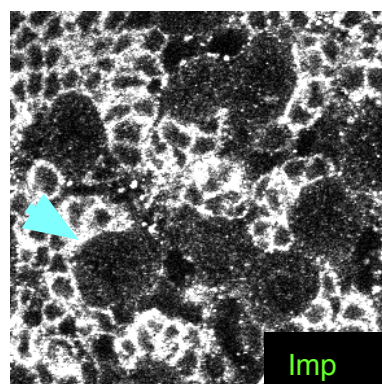

Supplement: supp [file elife-51529-supp-v1.zip]
